# Supplementary material for: Bee venom-loaded EGFR-targeting peptide-coupled chitosan nanoparticles for effective therapy of hepatocellular carcinoma by inhibiting EGFR-mediated MEK/ERK pathway
Source: PubMed Central journal article supplement (PMC9365195; doi:10.1371/journal.pone.0272776), 2022-08-10
Supplement: pone.0272776.s001.pdf [file pone.0272776.s001.pdf]

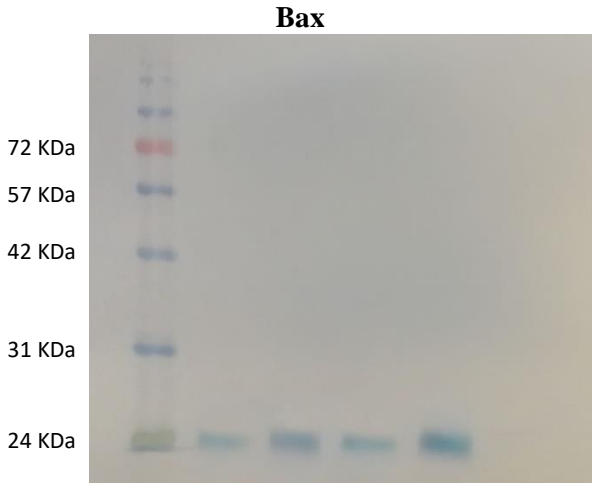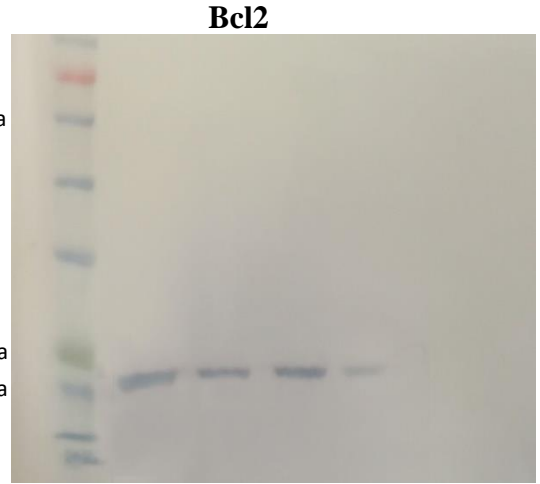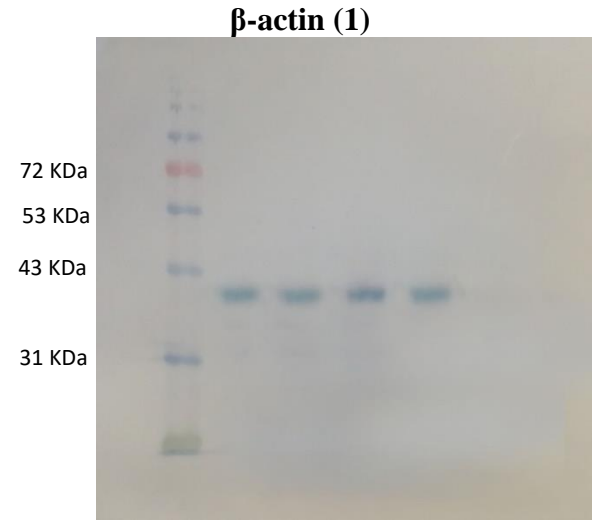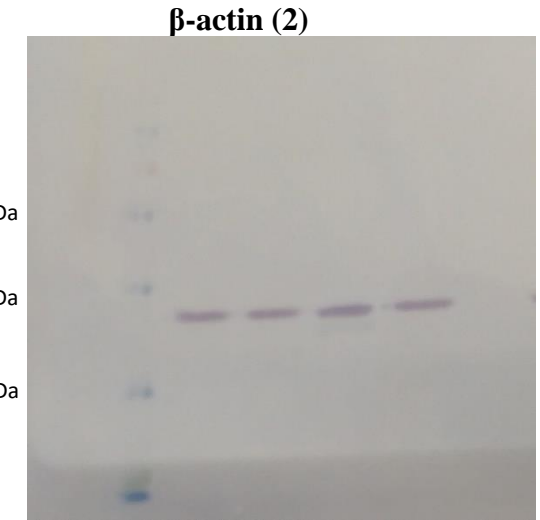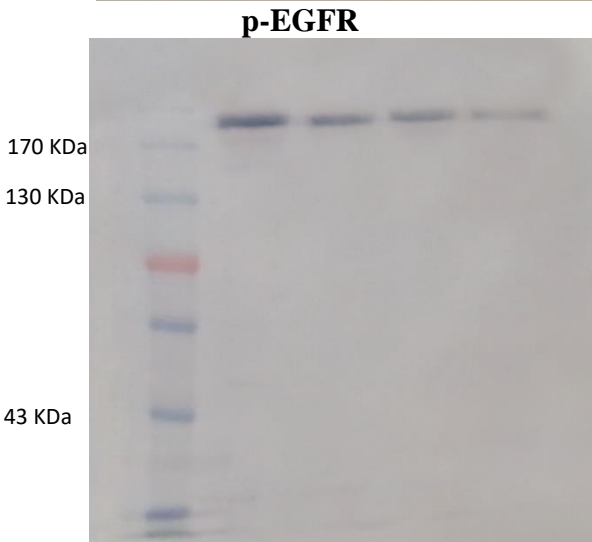

**Non-treated HepG2 cells**  
**Bee V enom-treated cells**  
**Non-targeted CSNPs**  
**Targeted Bee venom-CSNPs**

**Non-treated HepG2 cells**  
**Bee Venom-treated cells**  
**Non-targeted CSNPs**  
**Targeted Bee venom-CSNPs**

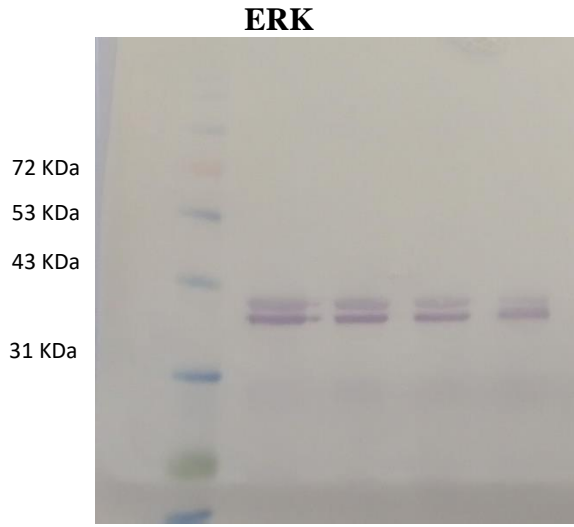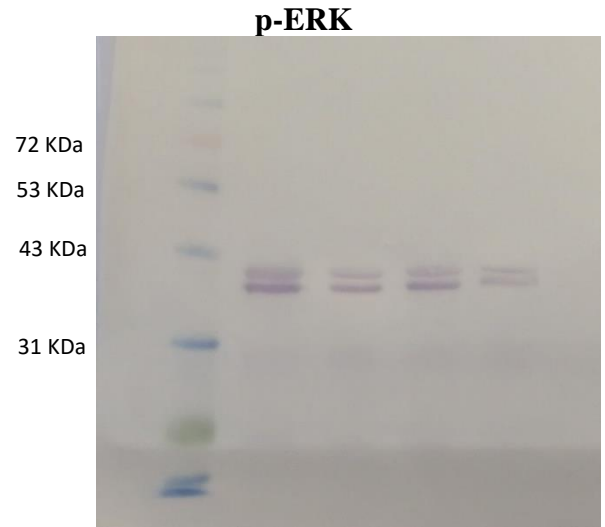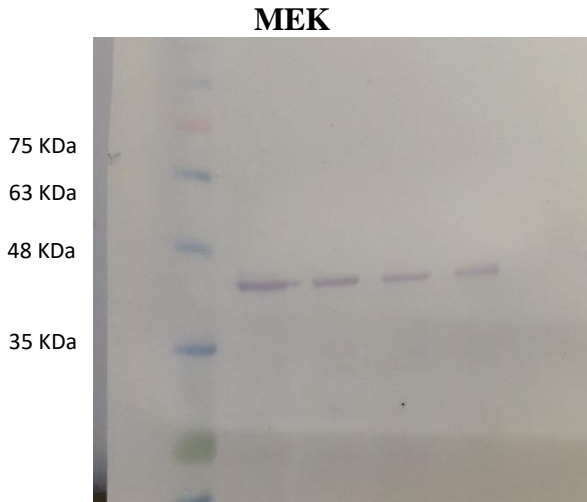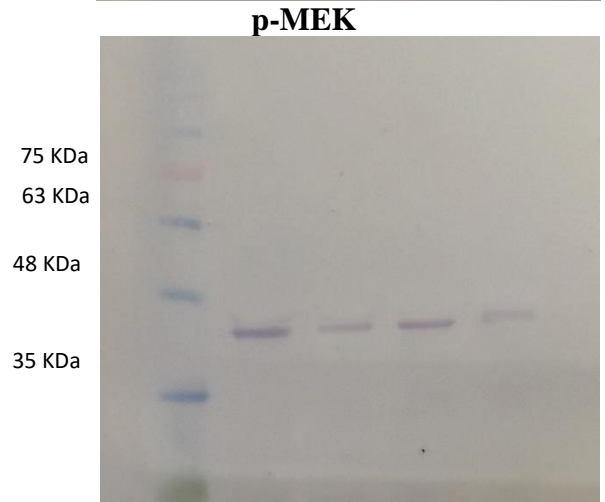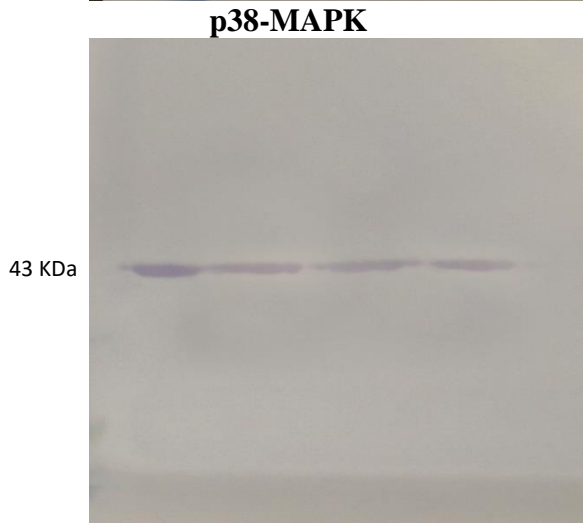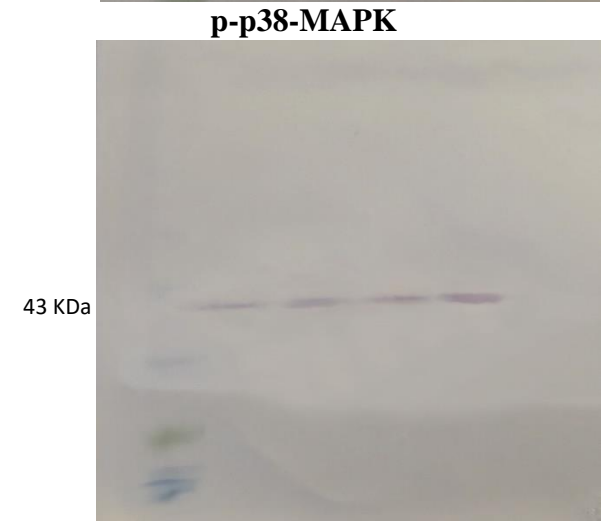

**Non-treated HepG2 cells**  
**Bee Venom-treated cells**  
**Non-targeted CSNPs**  
**Targeted Bee venom-CSNPs**

**Non-treated HepG2 cells**  
**Bee Venom-treated cells**  
**Non-targeted CSNPs**  
**Targeted Bee venom-CSNPs**
